# Supplementary material
Source: MDPI journal article supplement (https://www.mdpi.com/2311-7524/9/4/505)
Supplement: s1 [file s1]

## *Supplementary Material*

### 1 Supplementary Tables

Table S1. Data output from ITS2 amplicon sequencing

| Sample  | Seq_num      | Base_num      | Mean_length      |
|---------|--------------|---------------|------------------|
| CTM13_1 | 60738        | 19163437      | 316              |
| CTM13_2 | 62080        | 19920572      | 321              |
| CTM13_3 | 59669        | 18900936      | 317              |
| CTM9_1  | 56835        | 17302582      | 304              |
| CTM9_2  | 57994        | 17754902      | 306              |
| CTM9_3  | 57321        | 17379432      | 303              |
| CTM5_1  | 60696        | 18324559      | 302              |
| CTM5_2  | 61899        | 18821552      | 304              |
| CTM5_3  | 55647        | 16874358      | 303              |
| CTM3_1  | 57575        | 17630805      | 306              |
| CTM3_2  | 55556        | 16798510      | 302              |
| CTM3_3  | 59114        | 17897421      | 303              |
| CTM1_1  | 63220        | 19163739      | 303              |
| CTM1_2  | 57200        | 17342952      | 303              |
| CTM1_3  | 62112        | 18930681      | 305              |
|         | sum(Seq_num) | sum(Base_num) | ave(Mean_length) |
|         | 887656       | 272206438     | 307              |

Table S2. Variance Proportion of RDA analysis at OTU level

|      | Proportion of Variance |
|------|------------------------|
| RDA1 | 0.3609                 |
| RDA2 | 0.176                  |
| RDA3 | 0.1285                 |
| RDA4 | 0.0256                 |
| RDA5 | 0.0147                 |
| RDA6 | 0.0039                 |
| PC1  | 0.1252                 |
| PC2  | 0.0835                 |
| PC3  | 0.0526                 |
| PC4  | 0.0151                 |
| PC5  | 0.0067                 |
| PC6  | 0.0037                 |
| PC7  | 0.0024                 |
| PC8  | 0.0011                 |

Table S3. Effect of soil chemical properties on soil fungal genera community composition using RDA analysis

|    | RDA1    | RDA2    | r <sup>2</sup> | P values |
|----|---------|---------|----------------|----------|
| OM | 0.9996  | 0.0266  | 0.2122         | 0.233    |
| TN | 0.7293  | 0.6842  | 0.4712         | 0.025    |
| TP | -0.4262 | 0.9046  | 0.5848         | 0.004    |
| TK | -0.6914 | 0.7225  | 0.2686         | 0.166    |
| EC | -0.585  | 0.8111  | 0.7652         | 0.001    |
| PH | 0.9097  | -0.4152 | 0.7605         | 0.001    |

Table S4. Spearman correlation heatmap analysis between soil fungal genera and soil chemical properties

|                         | correlation |       |       |       |       |       | p value |      |      |      |      |      |
|-------------------------|-------------|-------|-------|-------|-------|-------|---------|------|------|------|------|------|
|                         | OM          | TN    | TP    | TK    | EC    | PH    | OM      | TN   | TP   | TK   | EC   | PH   |
| <i>g__Trichocladium</i> | 0.29        | 0.44  | -0.37 | -0.06 | -0.37 | 0.70  | 0.30    | 0.10 | 0.18 | 0.82 | 0.17 | 0.00 |
| <i>g__Chaetomium</i>    | 0.29        | 0.22  | -0.14 | 0.16  | 0.00  | 0.38  | 0.30    | 0.44 | 0.63 | 0.56 | 0.99 | 0.16 |
| <i>g__Lophotrichus</i>  | 0.23        | 0.20  | -0.06 | -0.51 | -0.15 | -0.03 | 0.41    | 0.47 | 0.82 | 0.05 | 0.60 | 0.90 |
| <i>g__Fusarium</i>      | -0.17       | 0.32  | 0.59  | 0.54  | 0.59  | -0.36 | 0.55    | 0.25 | 0.02 | 0.04 | 0.02 | 0.19 |
| <i>g__Acaulium</i>      | -0.22       | 0.14  | 0.49  | 0.17  | 0.53  | -0.68 | 0.43    | 0.61 | 0.06 | 0.54 | 0.04 | 0.00 |
| <i>g__Pyrenochaeta</i>  | -0.10       | -0.17 | -0.38 | 0.01  | -0.58 | 0.02  | 0.72    | 0.55 | 0.17 | 0.98 | 0.02 | 0.94 |
| <i>g__Pseudaleuria</i>  | -0.03       | 0.34  | 0.77  | 0.44  | 0.69  | -0.72 | 0.92    | 0.22 | 0.00 | 0.10 | 0.00 | 0.00 |
| <i>g__Heydenia</i>      | -0.26       | 0.25  | -0.04 | 0.07  | 0.05  | -0.14 | 0.34    | 0.37 | 0.90 | 0.80 | 0.86 | 0.61 |
| <i>g__Chrysosporium</i> | 0.21        | 0.21  | -0.24 | -0.23 | -0.45 | -0.08 | 0.45    | 0.44 | 0.40 | 0.40 | 0.09 | 0.77 |
| <i>g__Mortierella</i>   | -0.47       | -0.09 | 0.33  | 0.28  | 0.61  | -0.69 | 0.08    | 0.75 | 0.24 | 0.31 | 0.02 | 0.00 |
| <i>g__Cercophora</i>    | -0.17       | 0.10  | 0.58  | 0.25  | 0.76  | -0.48 | 0.54    | 0.73 | 0.02 | 0.36 | 0.00 | 0.07 |
| <i>g__Cladosporium</i>  | -0.51       | -0.01 | 0.13  | 0.02  | 0.30  | -0.65 | 0.05    | 0.98 | 0.66 | 0.95 | 0.27 | 0.01 |
| <i>g__Tausonia</i>      | -0.46       | 0.01  | 0.44  | 0.26  | 0.52  | -0.50 | 0.08    | 0.98 | 0.11 | 0.34 | 0.05 | 0.06 |
| <i>g__Cheilymenia</i>   | 0.56        | 0.38  | 0.05  | 0.11  | -0.04 | 0.19  | 0.03    | 0.16 | 0.86 | 0.70 | 0.88 | 0.50 |
| <i>g__Schizothecium</i> | -0.68       | -0.31 | -0.15 | 0.07  | 0.19  | -0.42 | 0.01    | 0.27 | 0.59 | 0.80 | 0.51 | 0.12 |
| <i>g__Curvularia</i>    | -0.44       | -0.20 | 0.24  | 0.06  | 0.36  | -0.50 | 0.10    | 0.47 | 0.39 | 0.82 | 0.19 | 0.06 |

## 2 Supplementary Figures

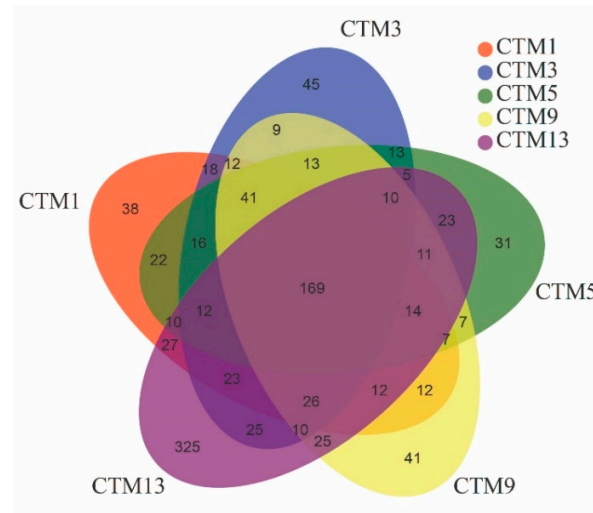

**Figure S1.** Venn diagram of OTU level among different CTM cycles.

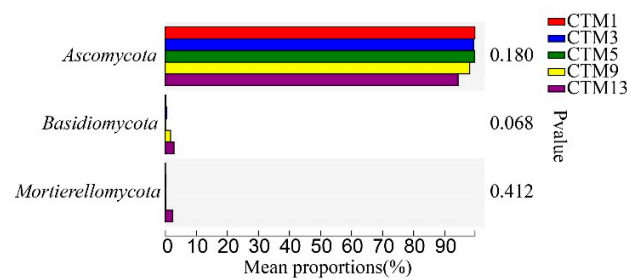

**Figure S2.** Difference analysis of soil fungal phyla among different CTM cycles. Significances between different treatments were compared using One-way ANOVA, with the results indicated by red asterisks.

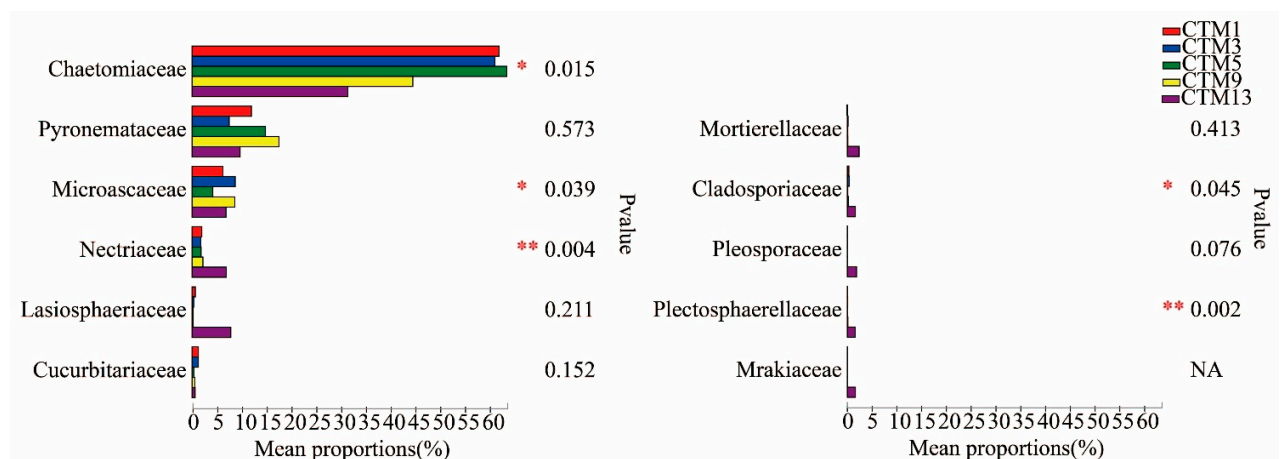

**Figure S3.** Difference analysis of soil fungal family among different CTM cycles. Significances between different treatments were compared using One-way ANOVA, with the results indicated by red asterisks (\*\* $P < 0.01$ ; \* $P < 0.05$ ).
